# Supplementary material for: Loneliness, Not Social Support, Is Associated with Cognitive Decline and Dementia Across Two Longitudinal Population-Based Cohorts
Source: PubMed Central journal article supplement — J Alzheimers Dis. 2022 Jan 4;85(1):295–308. doi: 10.3233/JAD-210330 (PMC9198751; doi:10.3233/jad-210330), 2022-01-04
Supplement: jad-85-jad210330-s001.pdf [file jad-85-jad210330-s001.pdf]

# Supplementary Material

## Loneliness, Not Social Support, Is Associated with Cognitive Decline and Dementia Across Two Longitudinal Population-Based Cohorts

**Supplementary Table 1.** Comparison of baseline characteristics between the included and excluded participants from the Rotterdam Study and the Swedish National study on Aging and Care in Kungsholmen.

|                                   | Rotterdam Study |           |        | SNAC-K        |              |       |
|-----------------------------------|-----------------|-----------|--------|---------------|--------------|-------|
|                                   | Included        | Excluded  | p      | Included      | Excluded     | p     |
| Loneliness, yes                   | 722 (15%)       | 345 (27%) | <0.001 | 612 (23.31%)  | 237 (38.92%) | <0.01 |
| Perceived social support, optimal | 3314 (69%)      | 714 (56%) | <0.001 | 1483 (55.77%) | 48 (24.62%)  | <0.01 |
| Marital status                    |                 |           |        |               |              |       |
| Married                           | 3326 (69%)      | 607 (48%) | <0.001 | 1265 (47.63%) | 179 (25.87%) | <0.01 |
| Single                            | 233 (5%)        | 57 (5%)   |        | 1391 (52.37%) | 513 (74.13%) |       |
| Widowed or divorced               | 1228 (26%)      | 465 (37%) |        |               |              |       |
| No. children                      |                 |           |        |               |              |       |
| 0 children                        | 468 (10%)       | 147 (12%) | 0.02   | 679 (26.46%)  | 229 (37.49%) | <0.05 |
| 1-2 children                      | 2227 (47%)      | 522 (41%) |        | 1380 (53.78%) | 294 (48.12%) |       |
| ≥3 children                       | 1442 (30%)      | 362 (29%) |        | 507 (19.76%)  | 88 (14.40%)  |       |

**Supplementary Table 2.** Correlation matrices of social support factors per study.

**a. Rotterdam Study, correlation matrix of social health determinants**

| Social health determinant   | 1     | 2     | 3     | 4 |
|-----------------------------|-------|-------|-------|---|
| 1. Perceived social support | -     |       |       |   |
| 2. Number of children       | 0.15  | -     |       |   |
| 3. Loneliness               | -0.12 | -0.02 | -     |   |
| 4. Marital status           | 0.04  | 0.12  | -0.33 | - |

Spearman's rank correlation values. Bold correlations are significant at  $p < 0.01$ .

**b. SNAC-K, correlation matrix of social health determinants factors**

| Social health determinant   | 1     | 2     | 3     | 4 |
|-----------------------------|-------|-------|-------|---|
| 1. Perceived social support | -     |       |       |   |
| 2. Number of children       | 0.06  | -     |       |   |
| 3. Loneliness               | -0.11 | -0.10 | -     |   |
| 4. Marital status           | 0.06  | 0.20  | -0.30 | - |

Spearman's rank correlation values. Bold correlations are significant at  $p < 0.01$ .

**Supplementary Table 3.** Associations of loneliness and social support with cognitive decline with Rotterdam Study (without inverting the MMSE score). Allows direct comparison to SNAC-K findings and is comparative to Table 3, however MMSE score is not inverted before log-transformation and standardization. Findings are comparable to inversed MMSE (but in opposite direction).

| MMSE                              |                   |                     |      |
|-----------------------------------|-------------------|---------------------|------|
| Determinants                      | Rotterdam Study   |                     |      |
|                                   | N; n <sup>a</sup> | Beta (95% CI)       | p    |
| Loneliness, yes                   | 4,509; 9,194      | -0.01 (-0.03; 0.00) | 0.21 |
| Perceived social support, optimal | 4,510; 9,193      | -0.01 (-0.01; 0.00) | 0.18 |
| Marital status                    | 4,514; 9,201      |                     |      |
| Married                           |                   | 0 [Reference]       | -    |
| Single                            |                   | -0.01 (-0.03; 0.01) | 0.36 |
| Widowed or divorced               |                   | 0.00 (-0.01; 0.01)  | 0.53 |
| No. children                      | 2,404; 4,959      |                     |      |
| 0 children                        |                   | 0.00 (-0.02; 0.01)  | 0.60 |
| 1-2 children                      |                   | 0 [Reference]       | -    |
| ≥3 children                       |                   | -0.01 (-0.02; 0.00) | 0.24 |

\*Please note that positive coefficients indicate better MMSE scores c.q. cognitive improvement for Rotterdam Study estimates.

**Supplementary Table 4.** Associations of loneliness and social support with cognitive decline and dementia risk, only adjusted for age, sex, and education.

**a. Cognitive Decline**

MMSE

| Determinants                      | Rotterdam Study*            |                     |      | SNAC-K                      |                      |      |
|-----------------------------------|-----------------------------|---------------------|------|-----------------------------|----------------------|------|
|                                   | N; assessments <sup>a</sup> | Beta (95% CI)       | p    | N; assessments <sup>a</sup> | Beta (95% CI)        | p    |
| Loneliness, yes                   | 4,509; 9,194                | 0.02 (0.00; 0.03)   | 0.05 | 2,087; 8,208                | -0.37 (-0.67; -0.07) | 0.02 |
| Perceived social support, optimal | 4,510; 9,193                | -0.01 (-0.02; 0.00) | 0.20 | 1,800; 7,132                | -0.01 (-0.27; 0.25)  | 0.94 |
| Marital status                    | 4,514; 9,201                |                     |      | 2,110; 8,300                |                      |      |
| Married                           |                             | 0 [Reference]       | -    |                             | 0 [Reference]        | -    |
| Single                            |                             | 0.02 (-0.00; 0.04)  | 0.10 |                             | 0.13 (-0.22, 0.48)   | 0.47 |
| Widowed/ divorced                 |                             | -0.00 (-0.01; 0.01) | 0.74 |                             | -0.22 (-0.51; 0.06)  | 0.12 |
| Number of children                | 2,404; 4,959                |                     |      | 2,030; 7,984                |                      |      |
| No children                       |                             | 0.01 (-0.02; 0.04)  | 0.56 |                             | 0.21 (-0.10; 0.51)   | 0.65 |
| One or two children               |                             | 0 [Reference]       | -    |                             | 0 [Reference]        | -    |
| ≥ Three children                  |                             | 0.00 (-0.01; 0.02)  | 0.83 |                             | 0.09 (-0.23; 0.43)   | 0.89 |
| <b>g-factor</b>                   |                             |                     |      |                             |                      |      |
| Determinants                      | N; assessments <sup>a</sup> | Beta (95% CI)       | p    | N; assessments <sup>a</sup> | Beta (95% CI)        | p    |
| Loneliness, yes                   | 4,313; 8,572                | 0.01 (-0.00; 0.01)  | 0.10 | 1,982; 7,284                | 0.05 (0.09; 0.00)    | 0.03 |
| Perceived social support, optimal | 4,314; 8,571                | -0.00 (-0.01; 0.00) | 0.31 | 1,905; 6,700                | 0.01 (-0.03; 0.05)   | 0.68 |
| Marital status                    | 4,319; 8,581                |                     |      | 2,002; 7,352                |                      |      |
| Married                           |                             | 0 [Reference]       | -    |                             | 0 [Reference]        | -    |
| Single                            |                             | 0.00 (-0.01; 0.01)  | 0.66 |                             | 0.00 (-0.05, 0.05)   | 0.88 |
| Widowed/divorced                  |                             | -0.00 (-0.01; 0.01) | 0.90 |                             | -0.05 (-0.09, -0.01) | 0.01 |
| Number of children                | 3,827; 7,579                |                     |      | 1,926; 7,068                |                      |      |
| No children                       |                             | -0.01 (-0.02; 0.00) | 0.18 |                             | 0.02 (-0.02; 0.06)   | 0.38 |
| One or two children               |                             | 0 [Reference]       | -    |                             | 0 [Reference]        | -    |
| ≥Three children                   |                             | -0.00 (-0.01; 0.00) | 0.17 |                             | 0.01 (-0.03; 0.06)   | 0.60 |

Estimates for the determinant\*time interaction term are provided, obtained with linear mixed models. This term is interpretable as the decline of cognitive functioning over time. We specified fixed effects as time from baseline, determinant, determinant\*time, time\*age, age, sex, and level of education (model 1). We specified only a random intercept.

As outcomes were standardized, estimates indicate how categories of the determinants change the outcome in standard deviations per year.

\*Please note that due to inverting the MMSE score, positive coefficients indicate not better but worse MMSE scores c.q. cognitive decline for Rotterdam Study estimates.

a N is number of unique participants, assessments could be made repeatedly up to three times for the same person

MMSE, Mini-Mental State Examination; CI, Confidence Interval; SNAC-K, Swedish National study on Aging and Care in Kungsholmen

## b. Incident Dementia

| Determinants                      | Incident dementia   |                   |      |                     |                   |      |
|-----------------------------------|---------------------|-------------------|------|---------------------|-------------------|------|
|                                   | Rotterdam Study     |                   |      | SNAC-K              |                   |      |
|                                   | Events/person-years | HR (95% CI)       | p    | Events/person-years | HR (95% CI)       | p    |
| Loneliness, yes                   | 504/44,709          | 1.36 (1.10; 1.69) | 0.01 | 292/12,399          | 2.11 (1.12; 3.98) | 0.02 |
| Perceived Social Support, optimal | 503/44,700          | 0.89 (0.81; 0.97) | 0.20 | 208/10,868          | 1.12 (0.56; 2.21) | 0.75 |
| Marital status                    | 504/44,753          |                   |      | 296/12,527          |                   |      |
| Married                           |                     | 1 [Reference]     | -    |                     | 1 [Reference]     | -    |
| Single                            |                     | 0.72 (0.46; 1.12) | 0.15 |                     | 0.70 (0.23; 2.09) | 0.52 |
| Widowed/divorced                  |                     | 0.98 (0.88; 1.10) | 0.87 |                     | 1.05 (0.56; 1.57) | 0.88 |
| Number of children                | 504/39,529          |                   |      | 289/12,048          |                   |      |
| No children                       |                     | 0.83 (0.62; 1.11) | 0.23 |                     | 0.48 (0.21; 1.11) | 0.09 |
| One or two children               |                     | 1 [Reference]     | -    |                     | 1 [Reference]     | -    |
| ≥Three children                   |                     | 1.17 (0.97; 1.41) | 0.10 |                     | 1.34 (0.69; 2.61) | 0.39 |

Hazard ratio estimates were obtained with Cox regression models using the full follow-up, and were adjusted for age, sex, and education (model 1).

CI; Confidence Interval, HR; Hazard ratio, SNAC-K, Swedish National study on Aging and Care in Kungsholmen

**Supplementary Table 5.** Indirect effects of mediation analysis: Social health (X) through depressive symptoms (M - Mediator) to cognitive decline or dementia (Y). For total effects please refer to Tables 3 and 4. NS indicates that these small effect sizes are extremely likely to be “Not Statistically Significant”, as calculating the p-value for the hand calculation of  $c - c'$  method is complicated [64].

| Indirect effects on decline in Mini-Mental State Examination (MMSE) |                 |    |        |      |
|---------------------------------------------------------------------|-----------------|----|--------|------|
| Determinants                                                        | Rotterdam Study |    | SNAC-K |      |
|                                                                     | Beta            | p  | Beta   | p    |
| Loneliness                                                          | 0.004           | NS | 0.053  | 0.31 |
| Perceived social support                                            | <0.001          | NS | -0.011 | 0.86 |
| Marital status                                                      | <0.001          | NS | -0.013 | 0.78 |
| No. children                                                        | <-0.001         | NS | -0.008 | 0.79 |
| Indirect effects on decline in g-factor                             |                 |    |        |      |
| Determinants                                                        | Rotterdam Study |    | SNAC-K |      |
|                                                                     | Beta            | p  | Beta   | p    |
| Loneliness, yes                                                     | 0.001           | NS | -0.006 | 0.42 |
| Perceived social support                                            | <0.001          | NS | <0.001 | 0.86 |
| Marital status                                                      | <0.001          | NS | 0.001  | 0.75 |
| No. children                                                        | <0.001          | NS | <0.001 | 0.85 |
| Indirect effects on incident dementia                               |                 |    |        |      |
| Determinants                                                        | Rotterdam Study |    | SNAC-K |      |
|                                                                     | HR              | p  | HR     | p    |
| Loneliness, yes                                                     | 0.03            | NS | 0.042  | 0.64 |
| Perceived social support                                            | 0.02            | NS | 0.046  | 0.90 |
| Marital status                                                      | 0.01            | NS | <0.001 | 0.83 |
| No. children                                                        | 0.010           | NS | <0.001 | 0.96 |
